# Supplementary material for: Effect of chemical degradation on fluxes of reactive compounds – a study with a stochastic Lagrangian transport model
Source: Copernicus journal article supplement (doi:10.5194/acp-12-4843-2012), 2012-06-01
Supplement: Supplementary file 1 [file acp-12-4843-2012-supplement.zip]

## Content of look-up tables

First line:  $z/h$

First column:  $Da_h$

Data: F/E

## Files

### **All lookup\_\*\_o\* files have LAI of 3.5**

lookup\_G\_o400.txt

ground source, below canopy oxidation rate 4 times that of above canopy

lookup\_G\_o100.txt

ground source, below canopy oxidation rate equals that of above canopy

lookup\_G\_o025.txt

ground source, below canopy oxidation rate 0.25 times that of above canopy

lookup\_C\_o400.txt

canopy source, below canopy oxidation rate 4 times that of above canopy

lookup\_C\_o100.txt

canopy source, below canopy oxidation rate equals that of above canopy

lookup\_C\_o025.txt

canopy source, below canopy oxidation rate 0.25 times that of above canopy

### **All lookup\_\*\_c\* files have constant oxidation rate profile**

lookup\_G\_c050.txt

ground source, LAI 1.75

lookup\_G\_c100.txt

ground source, LAI 3.5

lookup\_G\_c200.txt

ground source, LAI 7

lookup\_C\_c050.txt

canopy source, LAI 1.75

lookup\_C\_c100.txt

canopy source, LAI 3.5

lookup\_C\_c200.txt

canopy source, LAI 7
